# Supplementary material
Source: PubMed Central journal article supplement (PMC9272532)
Supplement: NIHMS1821946-supplement-Supplement.pdf [file NIHMS1821946-supplement-Supplement.pdf]

## Supplementary information for

### Pro-inflammatory polarization primes macrophages to transition into a distinct M2-like phenotype in response to IL-4

Erin M. O'Brien and Kara L. Spiller

School of Biomedical Engineering, Science, and Health Systems, Drexel University, Philadelphia, PA

Supplemental Table 1. RT-PCR primer sequences

| Gene          | Forward Sequence        | Reverse Sequence        |
|---------------|-------------------------|-------------------------|
| <b>AXL</b>    | CCGTGGACCTACTCTGGCT     | CCTTGGCGTTATGGGCTTC     |
| <b>CMKLR1</b> | CAGTTACGGTGATGAATACCCTG | GACGATGCTGTAGACCACCAC   |
| <b>IL10RB</b> | TACCACCTCCCGAAAATGTCA   | CCCAGTCTGAATGCTCATCTG   |
| <b>MERTK</b>  | GTGCAGCGTTCAGACAATGG    | TCGATGTAGATGGGATCAGACAC |
| <b>NR3C1</b>  | TGCCGCTATCGAAAATGTCTT   | GGGTAGGGGTGAGTTGTGGT    |
| <b>TLR2</b>   | TTATCCAGCACACGAATACACAG | AGGCATCTGGTAGAGTCATCAA  |
| <b>TNFR2</b>  | TTCATCCACGGATATTTGCAGG  | GCTGGGGTAAGTGTACTGCC    |
| <b>GAPDH</b>  | TGCACCACCAACTGCTTAGC    | GGCATGGACTGTGGTCATGAG   |

Supplemental Table 2. Custom Nanostring CodeSet – Dose response

| Gene    | Accession Number | Gene    | Accession Number |
|---------|------------------|---------|------------------|
| ACAA2   | NM_006111.2      | GAPDH   | NM_001256799.1   |
| AKAP5   | NM_004857.3      | FAM198A | NM_001129908.2   |
| ALOX15  | NM_001140.3      | HSPG2   | NM_005529.5      |
| ANGPTL4 | NR_104213.1      | IL10    | NM_000572.2      |
| AQP9    | NM_020980.3      | IL16    | NM_004513.4      |
| AXL     | NM_021913.2      | IL17RA  | NM_014339.4      |

|        |                |          |             |
|--------|----------------|----------|-------------|
| CACNB4 | NM_000726.3    | IL18     | NM_001562.2 |
| CASP4  | NM_001225.3    | IL1B     | NM_000576.2 |
| CASP8  | NM_001080124.1 | IL6      | NM_000600.3 |
| CBR1   | NM_001757.2    | IRF4     | NM_002460.1 |
| CCL17  | NM_002987.2    | ITGAV    | NM_002210.2 |
| CCL18  | NM_002988.2    | JAG1     | NM_000214.2 |
| CCL2   | NM_002982.3    | KLF4     | NM_004235.4 |
| CCL22  | NM_002990.3    | KRT1     | NM_006121.2 |
| CCL26  | NM_006072.4    | LY6E     | NM_002346.2 |
| CCL3   | NM_002983.2    | MARCO    | NM_006770.3 |
| CCL4   | NM_002984.2    | MMP10    | NM_002425.1 |
| CCL5   | NM_002985.2    | MMP27    | NM_022122.2 |
| CCL7   | NM_006273.2    | MMP8     | NM_002424.2 |
| CCL8   | NM_005623.2    | MMP9     | NM_004994.2 |
| CCR1   | NM_001295.2    | MRC1     | NM_002438.2 |
| CCR2   | NM_001123041.2 | MSR1     | NM_002445.3 |
| CCR3   | NM_001837.2    | NDUFA4   | NM_002489.2 |
| CCR7   | NM_001838.2    | NLRC3    | NM_178844.2 |
| CD163  | NM_004244.4    | NOS3     | NM_000603.4 |
| CD180  | NM_005582.2    | NOTCH4   | NM_004557.3 |
| CD209  | NM_001144899.1 | OTUB1    | NM_017670.2 |
| CD22   | NM_001771.2    | PARM1    | NM_015393.3 |
| CD274  | NM_014143.3    | PDCD1LG2 | NM_025239.3 |
| CD28   | NM_001243078.1 | PDGFB    | NM_033016.2 |
| CD33   | NM_001177608.1 | PDPN     | NM_006474.4 |
| CD37   | NM_001774.2    | CD31     | NM_000442.3 |
| CD38   | NM_001775.2    | PF4      | NM_002619.2 |

|         |                |          |                |
|---------|----------------|----------|----------------|
| CD44    | NM_001001392.1 | PPT1     | NM_000310.3    |
| CD47    | NM_001777.3    | PTGS1    | NM_000962.2    |
| CD80    | NM_005191.3    | RAMP1    | NM_005855.2    |
| CD93    | NM_012072.3    | RBM11    | XM_017028384.2 |
| CDH1    | NM_004360.2    | RETNLB   | NM_032579.2    |
| CD144   | NM_001795.3    | RPL4     | NM_000968.2    |
| CH25H   | NM_003956.3    | RPS23    | NM_001025.4    |
| CISH    | NM_145071.2    | SERPINB6 | NM_004568.4    |
| CLEC10A | NM_182906.2    | SIGLEC12 | NM_033329.1    |
| CRB2    | NM_173689.6    | SIGLEC6  | NM_001177548.1 |
| CX3CR1  | NM_001337.3    | SIGLEC8  | NM_014442.2    |
| CXCL2   | NM_002089.3    | SOCS1    | NM_003745.1    |
| IL8     | NM_000584.2    | ST8SIA6  | NM_001004470.1 |
| CXCL9   | NM_002416.1    | TAL1     | NM_003189.2    |
| CXCR3   | NM_001504.1    | TBP      | NM_001172085.1 |
| CXCR4   | NM_003467.2    | TEK      | NM_000459.3    |
| CYFIP1  | NM_014608.2    | TFRC     | NM_003234.1    |
| DACT1   | NM_001079520.1 | TGFA     | NM_003236.2    |
| DUOX1   | NM_175940.1    | TGM2     | NM_004613.2    |
| DUOXA1  | NM_001276265.1 | TLR3     | NM_003265.2    |
| EGFL7   | NM_016215.3    | TLR6     | NM_006068.2    |
| EHF     | NM_012153.3    | TLR7     | NM_016562.3    |
| ESPNL   | NM_194312.2    | TLR8     | NM_016610.2    |
| FAM110B | NM_147189.2    | TNF      | NM_000594.2    |
| FCER2   | NM_002002.4    | VEGFA    | NM_001025366.1 |
| GALNT18 | NM_198516.1    | VEGFB    | NM_003377.3    |

Supplemental Table 3. Custom Nanostring CodeSet – M1→M2 phenotyping

| <b>Gene</b> | <b>Accession Number</b> | <b>Gene</b> | <b>Accession Number</b> |
|-------------|-------------------------|-------------|-------------------------|
| ACTA2       | NM_001613.1             | FOXO4       | NM_001170931.1          |
| AGGF1       | NM_018046.3             | FST         | NM_006350.2             |
| ANG         | NM_001145.4             | FYN         | NM_002037.3             |
| BGN         | NM_001711.3             | GAPDH       | NM_001256799.1          |
| BTG1        | NM_001731.2             | HSPG2       | NM_005529.5             |
| CABLES1     | NM_001100619.2          | IDO1        | NM_002164.5             |
| CCL15       | NM_032965.4             | IGF1        | NM_000618.3             |
| CCL17       | NM_002987.2             | IL1B        | NM_000576.2             |
| CCL18       | NM_002988.2             | IL6         | NM_000600.3             |
| CCL2        | NM_002982.3             | JAG1        | NM_000214.2             |
| CCL22       | NM_002990.3             | LUM         | NM_002345.3             |
| CCL24       | NM_002991.2             | MARCO       | NM_006770.3             |
| CCL26       | NM_006072.4             | MMP2        | NM_004530.2             |
| CCL5        | NM_002985.2             | MMP9        | NM_004994.2             |
| CCL8        | NM_005623.2             | MRC1        | NM_002438.2             |
| CTGF        | NM_001901.2             | PDGFA       | NM_002607.5             |
| CCR7        | NM_001838.2             | PDGFB       | NM_033016.2             |
| CD163       | NM_004244.4             | PDGFC       | NM_016205.2             |
| CD200R1     | NM_138806.3             | PDGFRA      | NM_006206.3             |
| CD80        | NM_005191.3             | PDGFRB      | NM_002609.3             |
| CLEC10A     | NM_182906.2             | RAMP1       | NM_005855.2             |
| COL1A1      | NM_000088.3             | SPP1        | NM_000582.2             |
| COL3A1      | NM_000090.3             | STAT3       | NM_003150.3             |
| COL5A1      | NM_000093.3             | STAT6       | NM_003153.3             |

|        |                |           |                |
|--------|----------------|-----------|----------------|
| CTNNB1 | NM_001098210.1 | TBP       | NM_001172085.1 |
| CXCL12 | NM_199168.3    | TGFB1     | NM_000660.3    |
| CXCR4  | NM_003467.2    | TIE1      | NM_005424.2    |
| DACT1  | NM_001079520.1 | TIMP3     | NM_000362.4    |
| DCN    | NM_001920.3    | TNF       | NM_000594.2    |
| EGFL7  | NM_016215.3    | TNFRSF11A | NM_003839.3    |
| ETS1   | NM_005238.3    | VCAN      | NM_004385.3    |
| FGF2   | NM_002006.4    | VEGFA     | NM_001025366.1 |
| FLT1   | NM_002019.4    | VEGFB     | NM_003377.3    |
| FN1    | NM_212482.1    | VEGFC     | NM_005429.2    |
| FOXO1  | NM_002015.3    | VIM       | NM_003380.2    |
| FOXO3  | NM_001455.2    | WNT5A     | NM_003392.3    |

Supplemental Table 4. GO Enrichment Analysis of M1→M2 Phenotype

| <b>Biological Process</b>                                                             | <b>M1→M2 Fold Enrichment</b> |
|---------------------------------------------------------------------------------------|------------------------------|
| Basophil chemotaxis                                                                   | >100                         |
| Metanephric glomerular mesangial cell development                                     | >100                         |
| Chemoattraction of serotonergic neuron axon                                           | >100                         |
| Planar cell polarity pathway involved in midbrain dopaminergic neuron differentiation | >100                         |
| Negative regulation of cell proliferation in midbrain                                 | >100                         |
| Positive regulation of vascular associated smooth muscle cell dedifferentiation       | >100                         |
| Endocardial cushion cell development                                                  | >100                         |
| Planar cell polarity pathway involved in pericardium morphogenesis                    | >100                         |
| Planar cell polarity pathway involved in cardiac muscle tissue morphogenesis          | >100                         |
| Planar cell polarity pathway involved in cardiac right atrium morphogenesis           | >100                         |
| Planar cell polarity pathway involved in ventricular septum morphogenesis             | >100                         |
| Planar cell polarity pathway involved in outflow tract morphogenesis                  | >100                         |
| Non-canonical Wnt signaling pathway involved in heart development                     | >100                         |

|                                                                       |      |
|-----------------------------------------------------------------------|------|
| Positive regulation of protein kinase D signaling                     | >100 |
| Regulation of protein kinase D signaling                              | >100 |
| Negative regulation of endothelial cell differentiation               | >100 |
| Positive regulation of protein kinase C signaling                     | >100 |
| Positive regulation of T cell apoptotic process                       | >100 |
| Positive regulation of T cell chemotaxis                              | >100 |
| Regulation of T cell chemotaxis                                       | >100 |
| Dendritic cell chemotaxis                                             | >100 |
| Positive regulation of lymphocyte apoptotic process                   | >100 |
| Regulation of protein kinase C signaling                              | >100 |
| Positive regulation of lymphocyte chemotaxis                          | >100 |
| Regulation of cell-cell adhesion mediated by cadherin                 | >100 |
| Dendritic cell migration                                              | >100 |
| Cell surface receptor signaling pathway involved in heart development | >100 |
| Positive chemotaxis                                                   | >100 |
| Regulation of lymphocyte chemotaxis                                   | >100 |
| Monocyte chemotaxis                                                   | >100 |
| Positive regulation of leukocyte apoptotic process                    | >100 |
| Positive regulation of protein autophosphorylation                    | >100 |
| Positive regulation of T cell migration                               | >100 |
| Dopaminergic neuron differentiation                                   | >100 |
| Regulation of axon extension involved in axon guidance                | >100 |
| Activation of protein kinase B activity                               | >100 |
| Epithelial cell differentiation involved in kidney development        | >100 |
| Platelet-derived growth factor receptor signaling pathway             | >100 |
| Regulation of endothelial cell differentiation                        | >100 |
| Positive regulation of lymphocyte migration                           | >100 |
| Regulation of T cell apoptotic process                                | >100 |
| Positive regulation of smooth muscle cell migration                   | >100 |
| Regulation of T cell migration                                        | >100 |
| Negative regulation of epithelial cell differentiation                | >100 |
| Outflow tract morphogenesis                                           | >100 |
| Cell differentiation involved in kidney development                   | >100 |
| Negative regulation of fat cell differentiation                       | >100 |

|                                                            |      |
|------------------------------------------------------------|------|
| Regulation of protein autophosphorylation                  | >100 |
| Morphogenesis of an epithelial sheet                       | >100 |
| Lymphocyte chemotaxis                                      | >100 |
| Positive regulation of fibroblast proliferation            | >100 |
| Positive regulation of cytokine-mediated signaling pathway | >100 |
| Regulation of morphogenesis of a branching structure       | >100 |

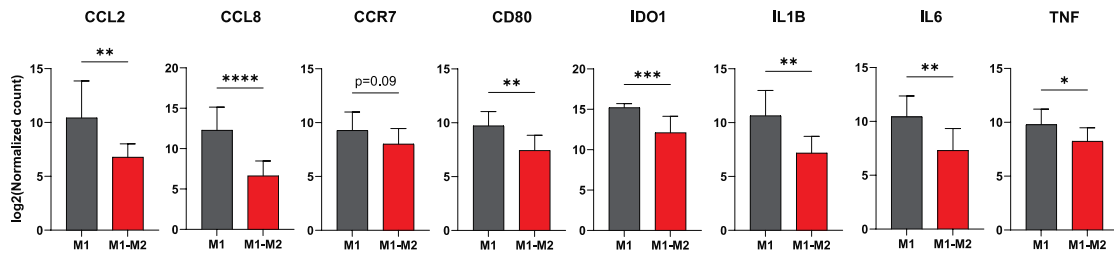

Supplemental Figure 1: Downregulation of M1 markers in M1-M2 macrophages. Data presented as mean  $\pm$  SD, n=10 donors. Two-tailed unpaired t-test, \*p<0.05, \*\*p<0.01, \*\*\*p<0.001, \*\*\*\*p<0.0001.
